# Supplementary material
Source: PubMed Central journal article supplement (PMC3033295)
Supplement: 1012516108_pnas.1012516108_SI.pdf [file 1012516108_pnas.1012516108_SI.pdf]

# Supporting Information

Andersen et al. 10.1073/pnas.1012516108

## SI Text

**Small-Angle Neutron Scattering (SANS) Data Analysis.** The SANS data from DMPC (1,2-dimyristoyl-sn-glycero-3-phosphocholine) and DOPC (1,2-dioleoyl-sn-glycero-3-phosphocholine) liposomes are fitted with a hollow three-shell model, i.e., as a combination of three concentric shells, where the middle layer describes the hydrophobic bilayer, and the outer and inner layers describe the outer and inner hydrophilic leaflets, respectively. The hollow three-shell model is straightforwardly derived from the Rayleigh form factor for spherical particles using the standard principles as, e.g., outlined by Pedersen (1). A weak polydispersity of the liposomes is clearly visible in the SANS data and explicitly taken into account in the model by integrating the model form factor over a Gaussian size distribution. A hydration of the hydrophilic head groups is allowed in the model. Molecular information about the chemical compositions as well as partial specific molecular volumes of the different sample constituents, respectively, DMPC, DOPC, sugar, and D<sub>2</sub>O are used for calculating the total scattering lengths, the scattering volumes, and the resulting excess scattering length densities of the hydrophobic and hydrophilic layers of the liposomes at different sugar concentrations. The sugar concentration dependent volumes of DMPC and DOPC obtained from the densitometry measurements were used for these calculations. The macroscopic ratio of hydrophilic and hydrophobic volumes in the liposomes is fixed to the corresponding molecular ratio by assuming that the molecular volume of the PC head groups is 320 Å<sup>3</sup> (2).

This usage of molecular constraints has previously been described and tested in more detail for other amphiphilic systems (3, 4), and the approach for modeling the liposomes is similar in spirit to the approach used by Kucerka and co-workers in recent work on phospholipid bilayers (5, 6). The bottom line is that the approach reduces the number of free parameters in the model fit and ensures that only physically realistic models are fitted to the experimental data.

As a test of the robustness of the results, the data were also attempted to be fitted with a more simple approach using a hollow one-shell model and no molecular constraints. Although this yielded slightly worse model fits and slightly lower values for the liposome bilayer thickness, the overall conclusions obtained using this approach were the same, and in both cases a significant thinning of the bilayers was observed upon addition of sugar to the D<sub>2</sub>O buffer.

The model fits are performed by means of a home-written Fortran program that calculates the scattering intensity as a function of a series of model parameters, folds the obtained scattering intensity with the resolution functions relevant for each instrumental setting, and fits the model scattering function by adjusting the model parameters using a Levenberg–Marquardt inspired steepest gradient approach (7).

The central fitting parameter from the SANS analysis is the bilayer thickness,  $D_{\text{bilayer}}$ . As discussed in the main text, the lateral area per lipid molecule,  $A$ , may be estimated as  $A = V_{\text{lip}}/D_{\text{bilayer}}$ , where  $V_{\text{lip}}$  is the lipid volume from Fig. 2. Fig. S1 shows how  $A$  changes with the concentration of sugar.

**Preferential Binding Parameters.** The dialysis data were analyzed along the lines of the preferential interaction theory (see, e.g., refs. 8 and 9). Specifically, we calculated the preferential binding parameter  $\Gamma_3$ , which is defined as

$$\Gamma_3 \equiv \left( \frac{\partial m_3}{\partial m_2} \right)_{\mu_3, P, T}, \quad [\text{S1}]$$

where  $m$  denotes molal concentration (mol solute/kg water) and subscript 2 and 3 identify, respectively, lipid and sugar.  $\Gamma_3$  is a thermodynamic function, which provides information on the number of bound solutes. It has been extensively used in discussions of protein–solute interactions (8, 9) and is also useful for membranes (10, 11).

All samples were dissolved in 50% 1-Propanol prior to the chromatographic analysis (see main article). For the outside (lipid free) samples, the chromatographic signal was converted directly into molal concentration units by comparison with an appropriate (molal) standard curve. For the inside samples, the measured amounts of lipid and sugar were used in combination with the densitometric data to calculate the volume fraction of lipid,  $\phi_{\text{lip}}$ , in the dialysis bag

$$\phi_{\text{lip}} = \frac{V_{\text{lip}} w_{\text{lip}}}{V_{\text{lip}} w_{\text{lip}} + V_{\text{solvent}} (1 - w_{\text{lip}})}. \quad [\text{S2}]$$

In Eq. S2  $w_{\text{lip}}$  is the weight fraction of the lipid, which is also known from the HPLC trials.  $V_{\text{lip}}$  is the partial specific volume of lipid given in Fig. 2.  $V_{\text{solvent}}$  is the specific volume of the aqueous phase (binary sugar–water mixture), which was also measured in this work. This function may be expressed by a polynomial fit to the experimental data;  $V_{\text{solvent}}(w_{\text{sugar}}) = aw_{\text{sugar}}^2 + bw_{\text{sugar}} + c$ . The parameters  $a$ ,  $b$ , and  $c$  for the different sugars and the range of validity of the fit are given in Table S1

The volume fraction of the aqueous solution inside the dialysis bag (i.e., the nonlipid volume) is  $\phi_{\text{solvent}} = 1 - \phi_{\text{lip}}$ , and it follows that the chromatographic signal must be divided by  $1 - \phi_{\text{lip}}$  to get the same unit (molal) as the lipid free sample taken outside the dialysis bag.

Using the corrected value, we calculated the difference in sugar concentration across the dialysis bag,  $\Delta m_3 = m_3^{\text{in}} - m_3^{\text{out}}$ . Initial trials showed that at a constant concentration of sugar,  $\Delta m_3$  scaled proportionally with the lipid concentration,  $m_2$ , in the investigated range [20–60 mmol lipid/(kg water)]. It follows that  $\Gamma_3$  is independent on the lipid concentration and the differential in Eq. S1 may be approximated  $\Gamma_3 \approx \Delta m_3/m_2$ . The preferential binding parameter  $\Gamma_3$  was calculated according to this approximation and plotted as a function of the free sugar concentration, in Fig. 3.

The preferential binding parameters measured here can be converted into a partitioning coefficient,  $P$ , for the distribution of sugar between the hydration layer near the membrane interface and the aqueous bulk as described elsewhere (11–13). In Table S2,  $P$  values are calculated for selected sugar concentrations and compared to literature data.

1. Pedersen JS (2002) Modelling of small angle scattering from colloids and polymer systems. *Neutrons, X-Rays and Light: Scattering Methods Applied to Soft Condensed Matter*, eds Linder P, Zemb Th (Elsevier, Amsterdam).
2. Nagle JF, Tristram-Nagle S (2000) Structure of lipid bilayers. *BBA-Rev Biomembranes* 1469:159–195.
3. Arleth L, et al. (2005) Detailed structure of hairy mixed micelles formed by phosphatidylcholine and PEGylated phospholipids in aqueous media. *Langmuir* 21:3279–3290.

4. Arleth L, et al. (1997) Small-angle scattering study of TAC8: A surfactant with cation complexing potential. *Langmuir* 13:1887–1896.
5. Kucerka N, et al. (2008) Lipid bilayer structure determined by the simultaneous analysis of neutron and x-ray scattering data. *Biophys J* 95:2356–2367.
6. Uhríkova D, Kucerka N, Teixeira J, Gordelíy V, Balgavy P (2008) Structural changes in dipalmitoylphosphatidylcholine bilayer promoted by Ca<sup>2+</sup> ions: A small-angle neutron scattering study. *Chem Phys Lipids* 155:80–89.

7. Bevington PR (1969) *Data Reduction and Error Analysis for the Physical Sciences* (McGraw Hill, New York).
8. Record MT, Zhang WT, Anderson CF (1998) Analysis of effects of salts and uncharged solutes on protein and nucleic acid equilibria and processes: A practical guide to recognizing and interpreting polyelectrolyte effects, Hofmeister effects, and osmotic effects of salts. *Advances in Protein Chemistry*, ed Di Cera E (Academic, San Diego, CA), Vol 51, pp 281–353.
9. Timasheff SN (1998) Control of protein stability and reactions by weakly interacting cosolvents: The simplicity of the complicated. *Advances in Protein Chemistry*, ed Di Cera E (Academic, San Diego, CA), Vol 51, pp 355–432.
10. Westh P (2003) Unilamellar DMPC vesicles in aqueous glycerol: Preferential interactions and thermochemistry. *Biophys J* 84:341–349.
11. Westh P (2008) Glucose, sucrose and trehalose are partially excluded from the interface of hydrated DMPC bilayers. *Phys Chem Chem Phys* 10:4110–4112.
12. Courtenay ES, Capp MW, Anderson CF, Record MT (2000) Vapor pressure osmometry studies of osmolyte-protein interactions: Implications for the action of osmoprotectants in vivo and for the interpretation of “osmotic stress” experiments in vitro. *Biochemistry* 39:4455–4471.
13. Felitsky DJ, Record MT (2004) Application of the local-bulk partitioning and competitive binding models to interpret preferential interactions of glycine betaine and urea with protein surface. *Biochemistry* 43:9276–9288.

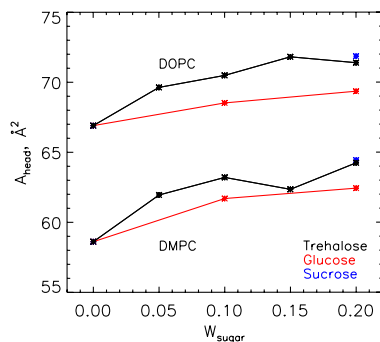

Fig. S1. Lateral area per lipid molecule for DMPC and DOPC plotted as a function of the weight fraction of sugar. The areas were calculated as the ratio of membrane volume (Fig. 2) and thickness (Fig. 1).

**Table S1. Parameters for the determination of the specific volume of binary aqueous sugar solutions**

| Sugar:                           | Trehalose | Glucose  | Sucrose  |
|----------------------------------|-----------|----------|----------|
| Maximal valid $w_{\text{sugar}}$ | 0.35      | 0.42     | 0.41     |
| $a$                              | 0.021245  | 0.025257 | 0.015631 |
| $b$                              | -0.39484  | -0.38225 | -0.3852  |
| $c$                              | 1.00798   | 1.00798  | 1.00798  |

The experimental data at 40 °C are fitted to the polynomial  $V_{\text{solvent}}(w_{\text{sugar}}) = aw_{\text{sugar}}^2 + bw_{\text{sugar}} + c$ , where  $w_{\text{sugar}}$  is the weight fraction of the sugar. The expressions are valid from  $w_{\text{sugar}} = 0$  to the value listed in the second row.

**Table S2. The partitioning between membrane interface and bulk for small sugars**

| Bulk sugar concentration |                                         |       |         |                      |              |
|--------------------------|-----------------------------------------|-------|---------|----------------------|--------------|
| Sugar                    | mol (kg H <sub>2</sub> O) <sup>-1</sup> | Lipid | $P$     | Method               | Reference    |
| Glucose                  | 1.6*                                    | DMPC  | 0.61    | SANS                 | (1)          |
| Glucose                  | 1.1*                                    | DOPE  | 0.42    | SANS/SAXS            | (2)          |
| Glucose                  | 1.2*                                    | DPPC  | 0.38    | SANS                 | (3)          |
| Glucose                  | 1–2                                     | DMPC  | 0.5     | Vapor pressure       | (4)          |
| Sucrose                  | 1–1.5                                   | DMPC  | 0.2     | Vapor pressure       | (4)          |
| Trehalose                | 1–2.5                                   | DMPC  | 0.2     | Vapor pressure       | (4)          |
| Glucose                  | 0.15/1.0                                | DMPC  | 1.9/0.7 | Dialysis equilibrium | Current work |
| Trehalose                | 0.15/0.75                               | DMPC  | 2.5/0.6 | Dialysis equilibrium | Current work |
| Sucrose                  | 0.15/1                                  | DMPC  | 2.3/0.8 | Dialysis equilibrium | Current work |

The partitioning coefficient,  $P = [\text{sugar}]_{\text{local}}/[\text{sugar}]_{\text{bulk}}$  specifies the ratio of sugar concentrations in these two domains, and it may be translated into a free energy of transfer as  $\Delta G^\circ = -RT \ln P$ . For the current data,  $P$  was calculated as described in ref. 4.

\*Estimated from volume fractions given in the reference and the density data in Table S1.

1. Deme B, Dubois M, Zemb T (2002) Swelling of a lecithin lamellar phase induced by small carbohydrate solutes. *Biophys J* 82:215–225.
2. Kent B, et al. (2010) Measurement of glucose exclusion from the fully hydrated DOPE inverse hexagonal phase. *Soft Matter* 6:1197–1202.
3. Lenne T, Bryant G, Garvey CJ, Kelderling U, Koster KL (2006) Location of sugars in multilamellar membranes at low hydration. *Physica B* 385–386:862–864.
4. Westh P (2008) Glucose, sucrose and trehalose are partially excluded from the interface of hydrated DMPC bilayers. *Phys Chem Chem Phys* 10:4110–4112.
